# Supplementary material for: Human-Nature Interactions during and after the COVID-19 Pandemic in Moscow, Russia: Exploring the Role of Contact with Nature and Main Lessons from the City Responses
Source: MDPI journal article supplement (doi:10.3390/land11060822), 2022-05-31
Supplement: s1 [file s1]

**Coronavirus: the ways to contact nature and meaning of green for people during and after the COVID-19 pandemic**

**Questionnaire survey:**

**1. What is the city of your current residence**

\_\_\_\_\_ (if possible please also indicate the postal code)

**2. How long has (had) your city / place of residence / neighborhood been in lockdown, shelter-in-place or quarantine? \_\_\_\_\_ (please indicate the number of days)**

**3. Thinking about the general actions taken in response to the COVID-19 pandemic where you live, please indicate the type of impact each of these actions have had on a) your daily life and b) your personal wellbeing (several answers are possible):**

**a) impact on your daily life (use the scale provided)**

| General Actions              | Very negative | Slightly negative | No impact | Slightly positive | Very positive | I don't know |
|------------------------------|---------------|-------------------|-----------|-------------------|---------------|--------------|
| Lockdowns                    | 1             | 2                 | 3         | 4                 | 5             |              |
| Social Distancing            | 1             | 2                 | 3         | 4                 | 5             |              |
| Working remotely             | 1             | 2                 | 3         | 4                 | 5             |              |
| Other _____ (please specify) | 1             | 2                 | 3         | 4                 | 5             |              |

**b) impact on your personal wellbeing (use the scale provided)**

| General Actions        | Very negative | Slightly negative | No impact | Slightly positive | Very positive | I don't know |
|------------------------|---------------|-------------------|-----------|-------------------|---------------|--------------|
| Lockdowns              | 1             | 2                 | 3         | 4                 | 5             |              |
| Social Distancing      | 1             | 2                 | 3         | 4                 | 5             |              |
| Working remotely       | 1             | 2                 | 3         | 4                 | 5             |              |
| Other (please specify) | 1             | 2                 | 3         | 4                 | 5             |              |

**4. What do you do, if anything, to deal with them? (several answers are possible)**

- ☐ I take a walk (if it is allowed)
- ☐ I do some outdoor physical / mental exercises
- ☐ I've developed / undertaken activity which help me to reduce stress (please specify) \_\_\_\_\_
- ☐ I am connected with the world via \_\_\_\_\_ (please specify)
- ☐ others \_\_\_\_\_ (please specify)

**5. In your opinion, how important is contact with nature for your mental and physical wellbeing? (Please indicate your response using the options provided)**

|                                                    | Very important | Fairly important | Important | Slightly important | Not at all important | I don't know |
|----------------------------------------------------|----------------|------------------|-----------|--------------------|----------------------|--------------|
| for my Mental wellbeing<br>Contact with nature is: |                |                  |           |                    |                      |              |

|                                                              |  |  |  |  |  |  |
|--------------------------------------------------------------|--|--|--|--|--|--|
|                                                              |  |  |  |  |  |  |
| <b>for my Physical wellbeing<br/>Contact with nature is:</b> |  |  |  |  |  |  |

**6. What is the main value for you to be in nature / urban green space? (select all that apply)**

- ☐ physical activities (jogging, running, etc.)
- ☐ to breath fresh air
- ☐ sun bathing
- ☐ mental benefits (to reduce stress etc.)
- ☐ to relax and unwind
- ☐ to be in a comfortable and safe place
- ☐ spending time with family and visiting playgrounds
- ☐ social contacts (with friends, relatives or simply to feel social inclusion)
- ☐ escape the urban environment
- ☐ to connect with nature
- ☐ to have fun
- ☐ enjoy scenic beauty
- ☐ others \_\_\_\_\_(please specify)

**7. Is it allowed now in your city / district to go outside and use green space?**

- ☐ No, it is not allowed to go outside and I just grow plants in the apartment
- ☐ No, it is not allowed to go outside and I have only contact with balcony green
- ☐ Yes, it is allowed, but only in the backyard green
- ☐ No restrictions are performed and I can visit green space as before the COVID pandemics
- ☐ other \_\_\_\_\_(please specify)

**8. If it is allowed now in your city to go outside, where do you prefer to go? (several answers are possible)**

- ☐ I take a walk in a nearby park
- ☐ Urban gardening in my / my relatives' / my friends' allotment makes me feel good
- ☐ I go to the nature area situated far from home such as urban forest park
- ☐ I may go outside the city boundaries to spent time in countryside
- ☐ I am living in a countryside and do not suffer from deficit of contact with nature
- ☐ other \_\_\_\_\_(please specify)

**9. How often did you visit green spaces before the quarantine (corona-virus restrictions)?**

- ☐ Every day
- ☐ More than once a week
- ☐ Several times a month
- ☐ Once a month
- ☐ Less than once a month

**10. How often do/did you visit green spaces during the corona-virus restrictions?**

- ☐ Every day
- ☐ More than once a week
- ☐ Several times a month
- ☐ Once a month
- ☐ Less than once a month

**11. How often will you visit green spaces after the corona-virus restrictions are lifted?**

- ☐ Every day
- ☐ More than once a week
- ☐ Several times a month

- Once a month
- Less than once a month

**12. Do you see any positive side / benefits for nature and people from COVID related lockdown in your city?**  
**(several answers are possible)**

- No, nothing
- Yes, I am able to spend more time with my family now
- The air is getting cleaner – I can feel
- The noise is reduced
- The streets and neighborhoods not so crowded anymore
- The traffic is going down and I like this silence
- This lockdown related pause makes me think that lifestyle before the COVID was too crazy and stressful
- I can spend more time in the green
- I explored more wild life in the city (birds, animals, insects etc. which I've never seen before)
- I can hear more bird songs now
- others \_\_\_\_\_ (please specify)

**14. Do you think your neighborhood needs additional green space?**

- Yes, my neighborhood always needed additional urban green spaces
- During COVID there is an urgent need for additional green spaces adapted to new normal
- No
- I don't know

**15. If yes, please specify what particular green spaces are needed personally for you and your family (several answers are possible)**

- green front- and backyards
- more green spaces near your house (trees, shrubs, etc.)
- more playgrounds for children
- more green space for active recreation (also with installation for physical exercises)
- more public parks
- more street greening
- more community gardens
- more school and kindergarten green spaces
- more pocket parks and small gardens/squares for silent recreation
- to transform vacant lots and brownfields which we have near our house
- others \_\_\_\_\_ (please specify)

**16. What additional design / infrastructure elements would you add to the green space you most commonly use?**  
**(several answers are possible)**

- flowerbeds
- beds for fruits and vegetables
- benches
- shading places
- places for sheltering from the rain/snow
- playgrounds for children
- installations for physical exercise
- signs with information about nature
- arbours
- green walls
- pond
- water fountain
- others \_\_\_\_\_ (please specify)

**17. Please indicate what is your current employment status?**

- full-time remote (home)
- full-time office
- part-time remote (home)

- ☐ rotation: 2-3 days/week remote (home)
- ☐ I have been temporarily laid off
- ☐ I have been asked to take my vacation now
- ☐ I have been unemployed since \_\_\_\_\_
- ☐ I am a stay-at-home parent
- ☐ I need to combine full-time remote (home) and home schooling of my children
- ☐ I am a student
- ☐ Retired
- ☐ Others \_\_\_\_\_ (please specify)

**18. The place of your living is:**

- ☐ House
- ☐ Flat/Apartment/Maisonette
- ☐ Others \_\_\_\_\_ (please specify)

**19. How many people are living in your household (including you and children): \_\_\_\_\_ (the number)**

**20. Your age: \_\_\_\_\_ years old**

**21. What is the age of people living in your household (including children) \_\_\_\_\_ years old**

**22. Please indicate your gender:**

- ☐ Female
- ☐ Male
- ☐ Prefer not to say

**23. Please indicate the level of your education**

- ☐ School diploma
- ☐ Secondary special education
- ☐ University graduation (BSc., MSc., diploma)
- ☐ Post-university graduation (PhD., Dr. or similar)
- ☐ Others \_\_\_\_\_ (please specify)

**24. Do you have any other comment? \_\_\_\_\_**
